# Supplementary material
Source: PubMed Central journal article supplement (PMC5349767)
Supplement: NIHMS851599-supplement-Table_S1.pdf [file NIHMS851599-supplement-Table_S1.pdf]

**Table S1.** pIC<sub>50</sub> values, volume, and  $\pi$  values used in the QSAR investigation.

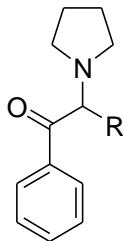

| R                                                                | pIC <sub>50</sub> DAT | Volume (Å <sup>3</sup> ) | Lipophilicity ( $\pi$ ) <sup>a</sup> |
|------------------------------------------------------------------|-----------------------|--------------------------|--------------------------------------|
| -H                                                               | 5.49                  | 175.39                   | 0                                    |
| -CH <sub>3</sub>                                                 | 6.70                  | 189.05                   | 0.46                                 |
| -CH <sub>2</sub> CH <sub>3</sub>                                 | 7.20                  | 211.61                   | 1.02                                 |
| -CH <sub>2</sub> CH <sub>2</sub> CH <sub>3</sub>                 | 7.74                  | 229.00                   | 1.55                                 |
| -CH(CH <sub>3</sub> ) <sub>2</sub>                               | 7.04                  | 231.20                   | 1.53                                 |
| -CH <sub>2</sub> (CH <sub>2</sub> ) <sub>2</sub> CH <sub>3</sub> | 7.92                  | 246.19                   | 2.13                                 |
| -C <sub>5</sub> H <sub>9</sub>                                   | 7.77                  | 253.22                   | 2.14                                 |
| -C <sub>6</sub> H <sub>11</sub>                                  | 8.10                  | 270.47                   | 2.82                                 |

<sup>a</sup> Hansch, C.; Leo, A.; Unger, S. H.; Kim, K. H.; Nikaitani, D.; Lien, E. J. (1973) "Aromatic" substituent constants for structure-activity correlations. *J. Med. Chem.* 16, 1207–1216.
